# Supplementary material
Source: publisher figshare collection journal article supplement (https://acs.figshare.com/ndownloader/files/28285267)
Supplement: Supplementary file 1 [file 28285267]

# Roles of Conformational Flexibility in the Crystallization of Stereo-irregular Polymer

Navin Kafle,<sup>†</sup> Yuta Makita,<sup>†</sup> Ying Zheng,<sup>†,‡</sup> Derek Schwarz,<sup>†</sup> Hiromichi Kurosu,<sup>‡</sup> Penju Pan,<sup>‡</sup> James M. Eagan,<sup>†</sup> Yuki Nakama,<sup>‡,\*</sup> Shigetaka Hayano,<sup>‡,\*</sup> and Toshikazu Miyoshi<sup>†,\*</sup>

<sup>†</sup>Department of Polymer Science, The University of Akron, Akron, Ohio 44325-3909, United States. <sup>‡</sup>Zeon Corporation R&D Center, 1-2-1 Yako, Kawasaki-ward, Kawasaki City, Kanagawa Prefecture 210-9507, Japan. <sup>‡</sup>State Key Laboratory of Chemical Engineering, College of Biological and Chemical Engineering, Zhejiang University, 38 Zheda Road, Hangzhou 310027, China. <sup>‡</sup>Department of Clothing Environmental Science, Nara Women's University, Kitauoya, Higashimachi, Nara 630-8506, Japan.

**Table S1.**  $T_{1C}$  values for all carbons for *s*-, *i*- and *a*-hPNBs at 117, 155, and 117 °C, respectively.

|                            | C1,4                                  | C2,3                                  | C5,6                                  | C7                                    |
|----------------------------|---------------------------------------|---------------------------------------|---------------------------------------|---------------------------------------|
| <i>s</i> -hPNB<br>(117°C)  | 291±91<br>(0.41±0.03) <sup>1</sup>    | 255±27<br>(0.37±0.12) <sup>1</sup>    | 243±23<br>(0.70±0.07) <sup>1</sup>    | 279±85                                |
| <i>i</i> -hPNB<br>(155°C)  | 7.20±0.29<br>(0.85±0.06) <sup>1</sup> | 0.52±0.02<br>(0.58±0.02) <sup>1</sup> | 4.75±0.15<br>(0.81±0.03) <sup>1</sup> | 7.20±0.29<br>(0.78±0.12) <sup>1</sup> |
| <i>a</i> -hPNB<br>(117 °C) | 1.55±0.03                             | 1.10±0.05<br>(0.35±0.01) <sup>1</sup> | 0.69±0.03                             | 1.55± 0.03                            |

1)  $T_{1C}$  for the amorphous region.

**Table S2.** <sup>13</sup>C CSA principal values and isotropic chemical shift values for all carbons for *a*-hPNB at 25 °C.

|      | $\sigma_{11}$ / ppm | $\sigma_{22}$ / ppm | $\sigma_{33}$ / ppm | $\sigma_{iso}$ / ppm |
|------|---------------------|---------------------|---------------------|----------------------|
| C5,6 | 49.0                | 32.0                | 15.0                | 32.4                 |
| C2,3 | 51.0                | 44.0                | 17.0                | 37.1                 |
| C1,4 | 60.0                | 46.0                | 22.0                | 42.5                 |
| C7   | 64.0                | 45.0                | 23.0                | 44.2                 |

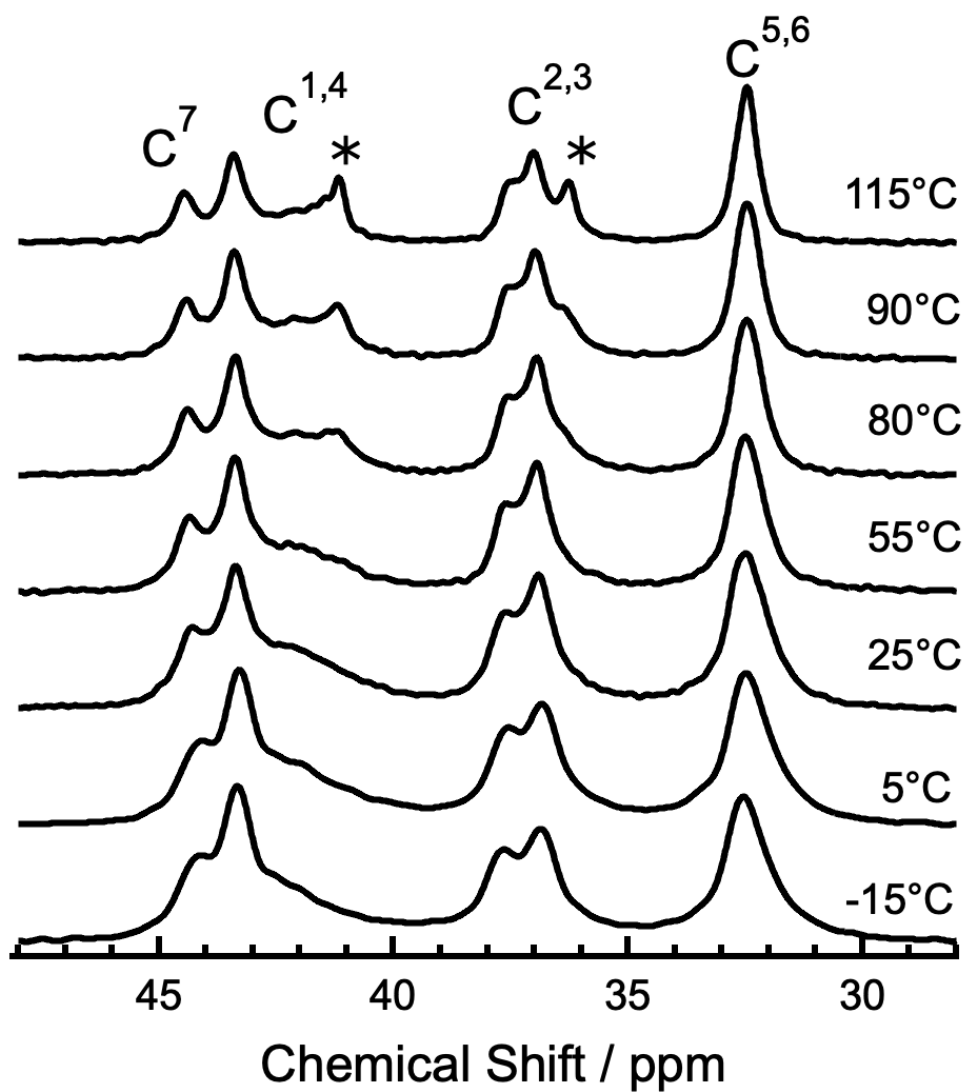

**Figure S1.**  $^{13}\text{C}$  CPMAS NMR spectra for *s*-hPNB at various temperatures. \* indicates signals from amorphous region.

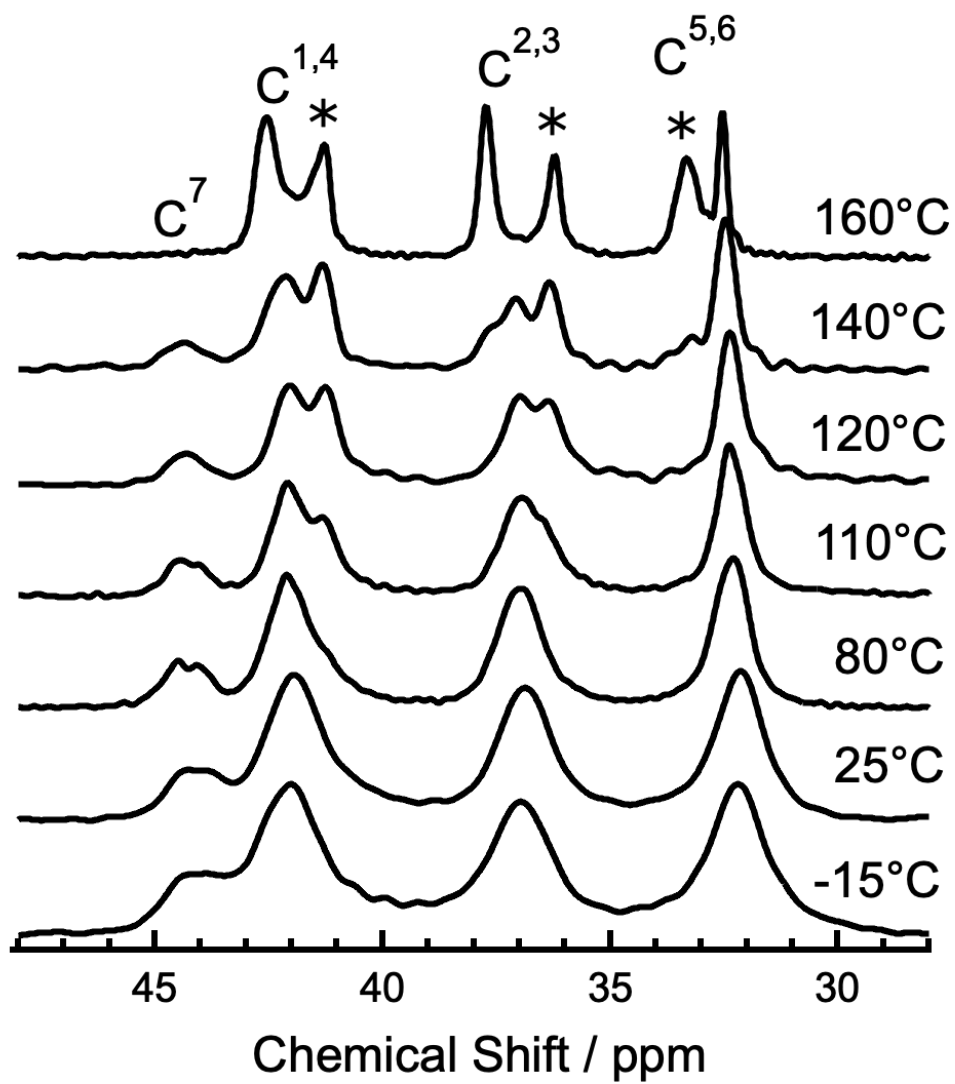

**Figure S2.**  $^{13}\text{C}$  CPMAS NMR spectra for *i*-hPNB at various temperatures. \* indicates signals from amorphous region.

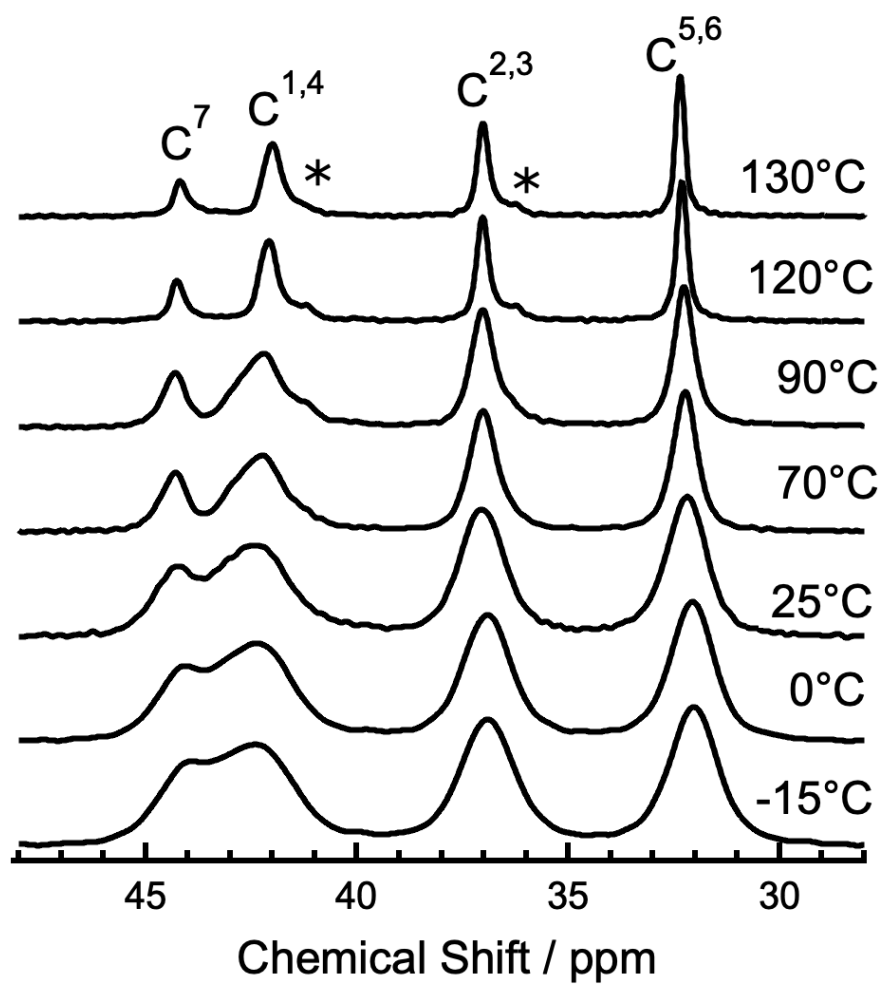

**Figure S3.**  $^{13}\text{C}$  CPMAS NMR spectra for  $\alpha$ -hPNB at various temperatures. \* indicates signals from amorphous region.

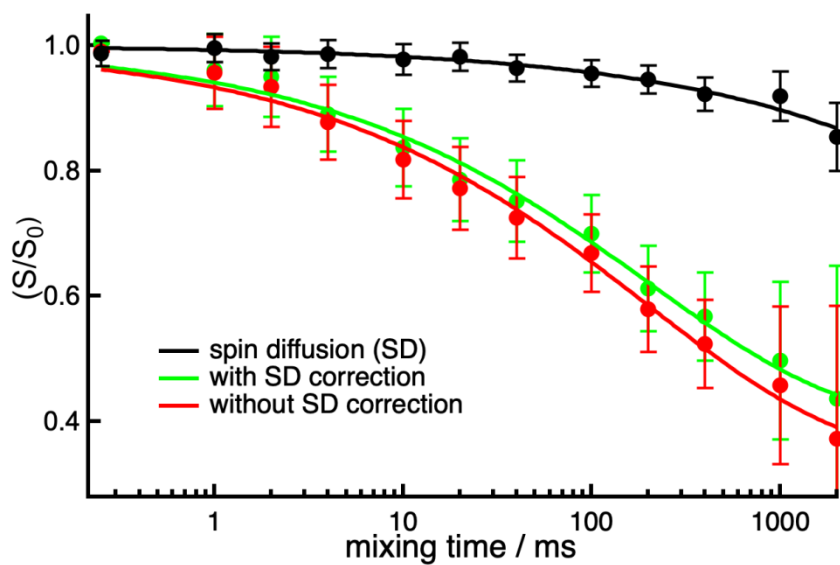

**Figure S4.** CODEX  $t_{\text{mix}}$  dependence for  $(S/S_0)$  for the C5,6 carbons for  $\alpha$ -hPNBs with  $t_{\text{evo}}$  of 4.5 ms at  $-5^\circ\text{C}$  (green circles) and at  $110^\circ\text{C}$  (red circles) and  $(S/S_0)^*$  for the C5,6 carbons for  $\alpha$ -hPNB after spin-diffusion correction (black circles).

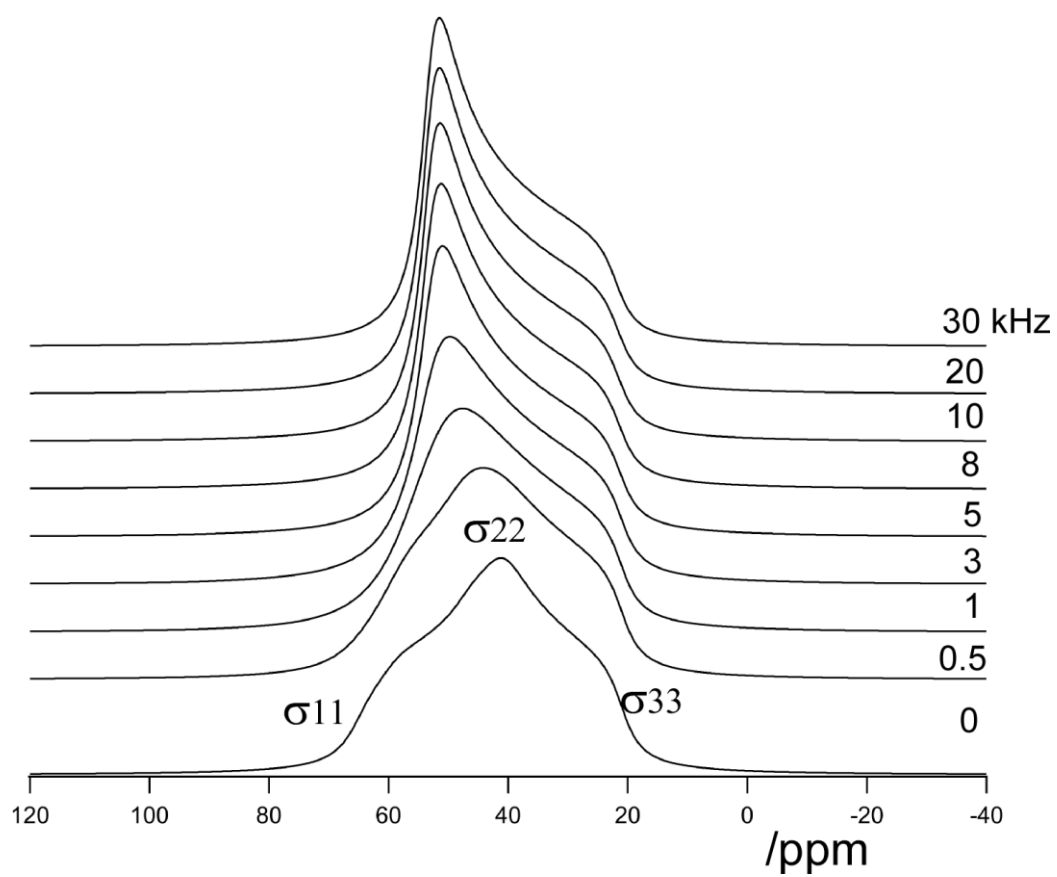

**Figure S5.**  $^{13}\text{C}$  simulated CSA patterns for uniaxial rotation of  $\text{C7}$  carbon around  $\sigma_{33}$  axis as a function of rotation rate,  $k$ .

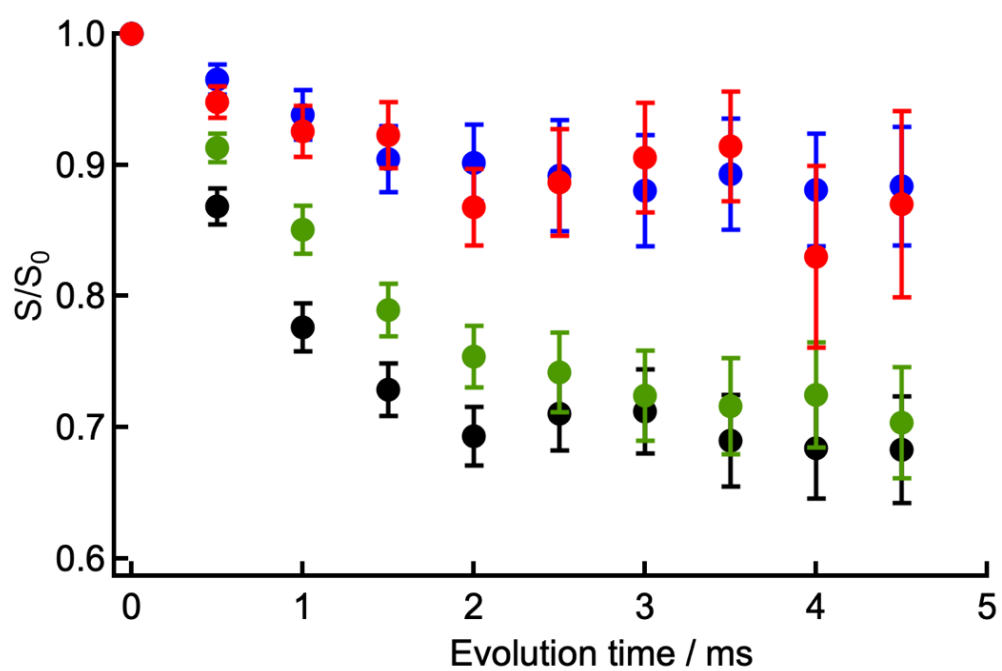

**Figure S6.** CODEX  $t_{\text{evo}}$  dependence of  $S/S_0$  for C5,6 (black filled circle), C1,4 (blue), C2,3 (green), and C7 (red) of *i*-hPNB with  $t_{\text{mix}}$  of 200 ms at 135°C.

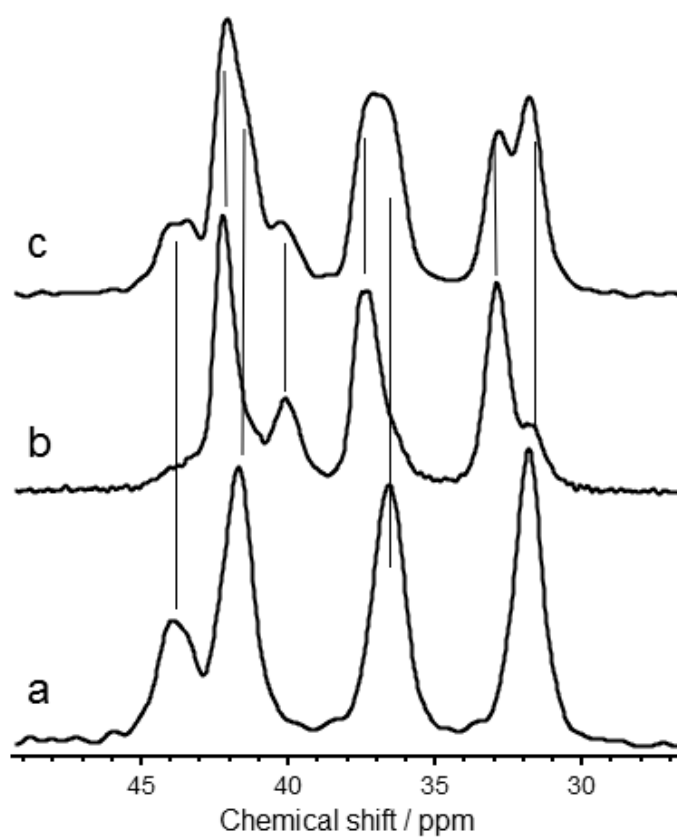

**Figure S7.**  $^{13}\text{C}$  CPMAS NMR spectra with  $T_{1\rho\text{H}}$  filter of 20 ms for *i*-hPNB (a) in fresh powder, (b) cooled from 155 °C, and crystallized from (c) the melt. All were measured at 25 °C.
